# Supplementary material
Source: HighWire-hosted journal article supplement (https://erj.ersjournals.com/content/56/3/2002895)
Supplement: inline-supplementary-material-1 [file inline-supplementary-material-1.pdf]

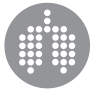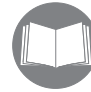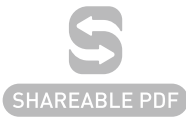

# Celebrating the ERS HERMES Self-Assessment Course

Robert Primhak<sup>1</sup>, Zuzana Tumova<sup>1</sup>, Amy Auer<sup>1</sup> and Daiana Stolz<sup>2</sup>

**Affiliations:** <sup>1</sup>European Respiratory Society, Lausanne, Switzerland. <sup>2</sup>Universitätsspital Basel, Klinik für Pneumologie, Basel, Switzerland.

**Correspondence:** Zuzana Tumova, European Respiratory Society, Avenue Sainte-Luce 4, 1003 Lausanne, Switzerland. E-mail: zuzana.tumova@ersnet.org

 @ERSpublications

The ERS HERMES self-assessment course has developed over the past 2 years into a well-established course giving the opportunity to access European standard formative assessments <https://bit.ly/3i1fEHL>

**Cite this article as:** Primhak R, Tumova Z, Auer A, *et al.* Celebrating the ERS HERMES Self-Assessment Course. *Eur Respir J* 2020; 56: 2002895 [<https://doi.org/10.1183/13993003.02895-2020>].

This single-page version can be shared freely online.

The European Respiratory Society (ERS) HERMES self-assessment course is celebrating its third year in 2020. Although it has a longer history, the course in its current format was launched in 2017 and has provided quality assessment to over 500 respiratory specialists around the world (table 1 shows a list of locations). Between 2018 and 2019, the number of courses delivered doubled and the first paediatric self-assessment course was offered in 2019. The ERS HERMES self-assessment course continues to grow in both its popularity and geographical reach.
